# Supplementary material
Source: Royal Society of Chemistry journal article supplement (doi:10.1039/d5ta10000c)
Supplement: d5ta10000c1.pdf [file d5ta10000c1.pdf]

## **Supporting Information**

### **Embedding uniform Ni nanoparticles into Silicalite-1 zeolite for dry reforming of methane**

Zhe Ma<sup>a</sup>, Peng Xu<sup>a</sup>, Chenzhao Wang<sup>a</sup>, Jiayu Wang<sup>a</sup>, Yongxiao Tuo<sup>a,\*</sup> and Hailing Guo<sup>a,\*</sup>

<sup>a</sup> State Key Laboratory of Heavy Oil Processing, China University of Petroleum, Qingdao 266580, PR  
China

**\*Corresponding author:**

Email address: Yongxiao Tuo@upc.edu.cn

Hailing Guo@upc.edu.cn

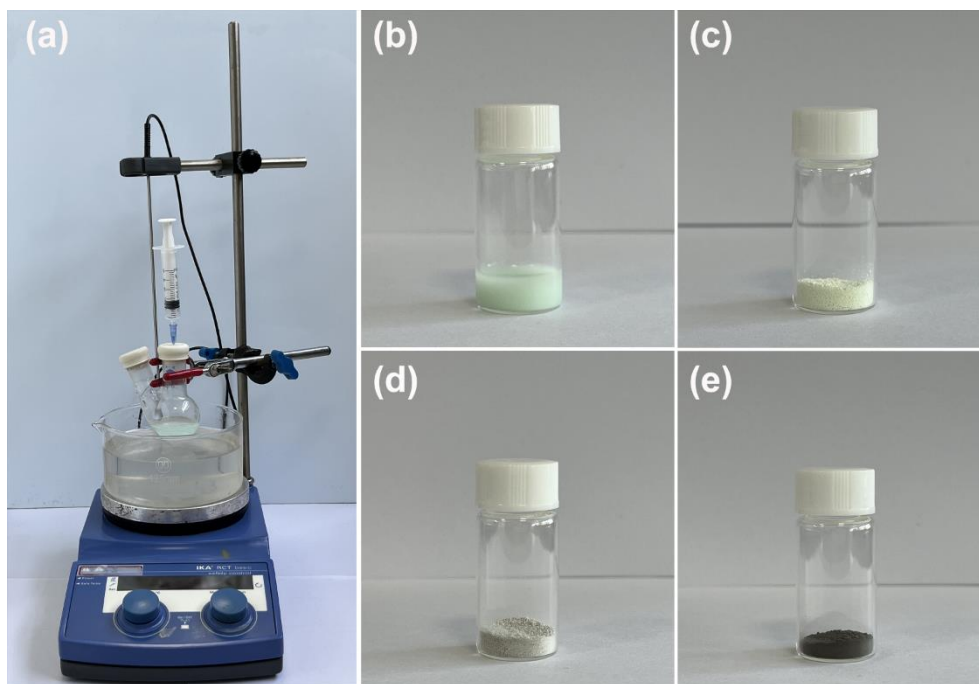

**Figure S1.** Ni-based Silicalite-1 catalysts prepared via deposition-precipitation and wet impregnation methods: (a) Ni/S-1-DP catalyst obtained by deposition-precipitation method; (b-e) Ni@S-1-WI catalyst prepared through wet impregnation method; (c) sample after drying; (d) sample after calcination; (e) sample after hydrogen reduction.

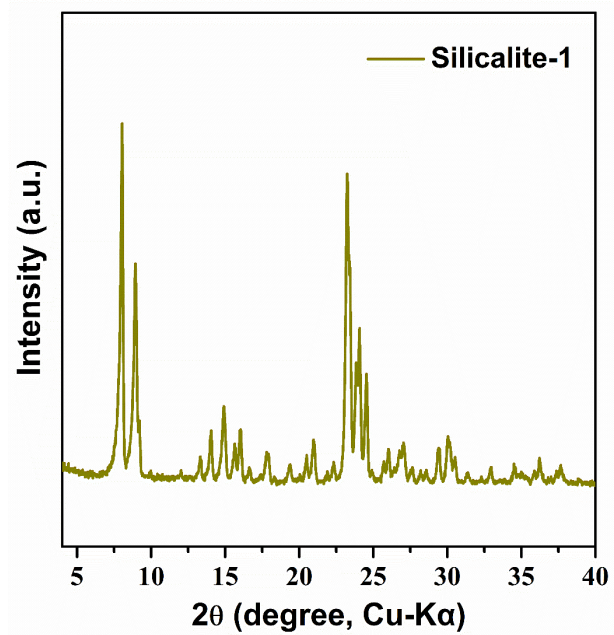

**Figure S2.** PXRD patterns of parent nanosized silicalite-1 zeolites.

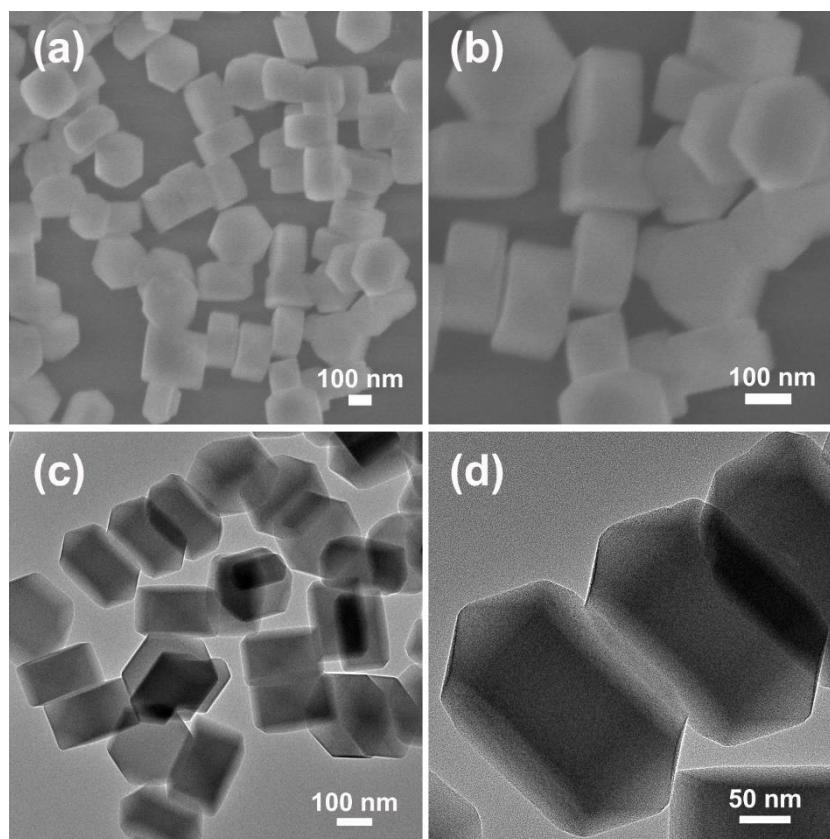

**Figure S3.** SEM images (a, b) and TEM images (c, d) of parent nanosized silicalite-1 zeolites.

**Table S1.** Data including binding energies and peak fitting areas from XPS analysis before and after H<sub>2</sub> reduction.

| Sample        | Ni 2P <sub>3/2</sub> |                       |                   | Ni 2P <sub>1/2</sub> |                       |                   |
|---------------|----------------------|-----------------------|-------------------|----------------------|-----------------------|-------------------|
|               | Binding Energy/eV    | Raw area <sup>a</sup> | FWHM <sup>a</sup> | Binding energy/eV    | Raw area <sup>a</sup> | FWHM <sup>a</sup> |
| 5% NiO@S-1-WI | 856.6                | 3208                  | 3.6               | 874.3                | 1631                  | 3.6               |
| 5% NiO/S-1-DP | 856.1                | 23177                 | 3.2               | 873.7                | 11732                 | 3.2               |
| 5% Ni@S-1-WI  | 855.6                | 3496                  | 3.4               | 872.5                | 1778                  | 3.4               |
| 5% Ni/S-1-DP  | 855.7                | 12599                 | 3.6               | 872.5                | 6314                  | 3.6               |

<sup>a</sup> obtained by Gaussian fitting method.

**Table S2.** Metal loading and porous properties of two Ni-based zeolite catalysts.

| Samples       | Ni <sup>a</sup><br>(wt%) | S <sub>BET</sub> <sup>b</sup><br>(m <sup>2</sup> g <sup>-1</sup> ) | S <sub>micro</sub> <sup>c</sup><br>(m <sup>2</sup> g <sup>-1</sup> ) | S <sub>ext</sub> <sup>c</sup><br>(m <sup>2</sup> g <sup>-1</sup> ) |
|---------------|--------------------------|--------------------------------------------------------------------|----------------------------------------------------------------------|--------------------------------------------------------------------|
| Silicalite-1  | /                        | 391                                                                | 242                                                                  | 149                                                                |
| 3% Ni@S-1-WI  | 2.32                     | 298                                                                | 210                                                                  | 88                                                                 |
| 5% Ni@S-1-WI  | 4.78                     | 284                                                                | 195                                                                  | 89                                                                 |
| 10% Ni@S-1-WI | 9.26                     | 266                                                                | 183                                                                  | 83                                                                 |
| 3% Ni/S-1-DP  | 1.92                     | 340                                                                | 235                                                                  | 105                                                                |
| 5% Ni/S-1-DP  | 4.11                     | 333                                                                | 214                                                                  | 119                                                                |
| 10% Ni/S-1-DP | 8.04                     | 291                                                                | 194                                                                  | 97                                                                 |

<sup>a</sup> obtained by ICP-AES. <sup>b</sup> S<sub>BET</sub>: total surface area, calculated by the BET method. <sup>c</sup> S<sub>micro</sub>: micropore surface area and S<sub>ext</sub>: mesopore surface area, calculated by the t-plot method.

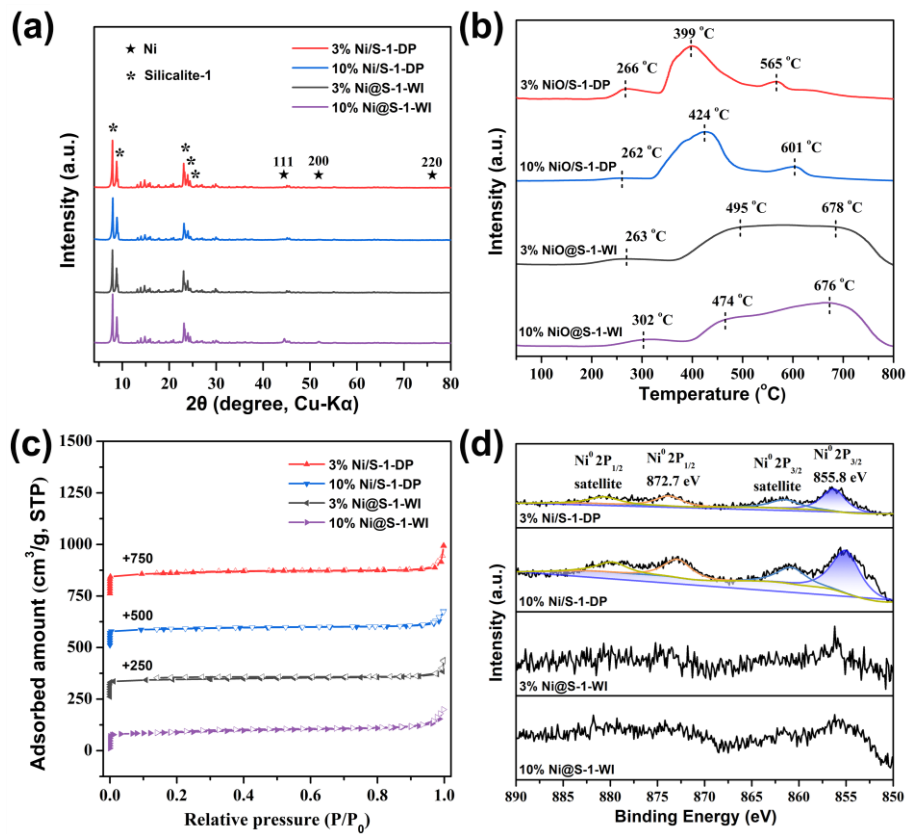

**Figure S4.** Characterization of the Ni@S-1-WI and Ni/S-1-DP with different Ni loadings. (a) PXRD patterns. (b) H<sub>2</sub>-TPR profiles. (c) N<sub>2</sub> adsorption/desorption isotherm. (d) XPS spectra.

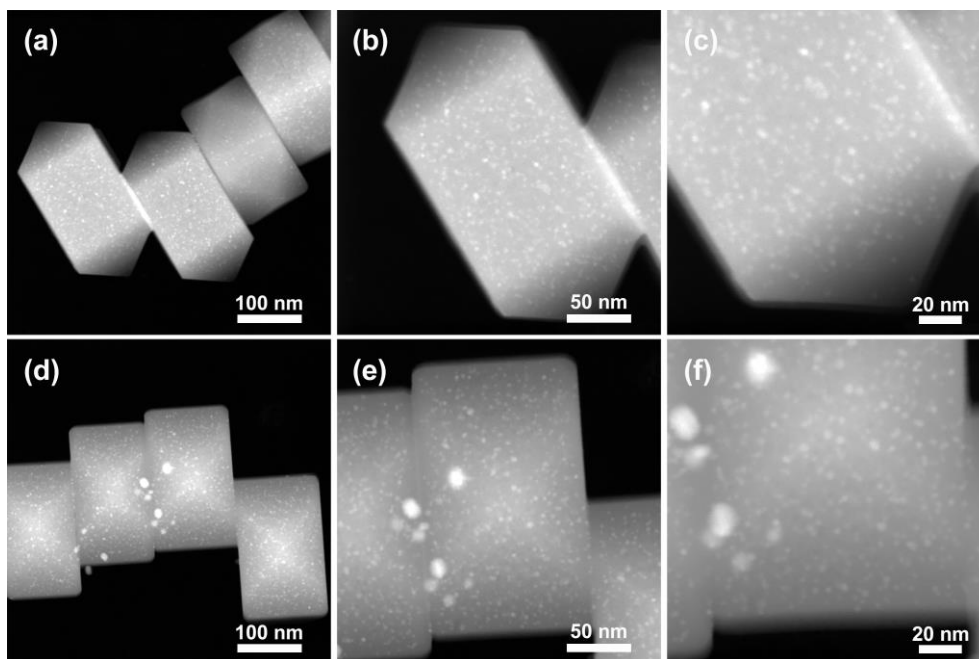

**Figure S5.** The HAADF-STEM images of catalysts 3% Ni@S-1-WI (a, b, c) and 10% Ni@S-1-WI (d, e, f).

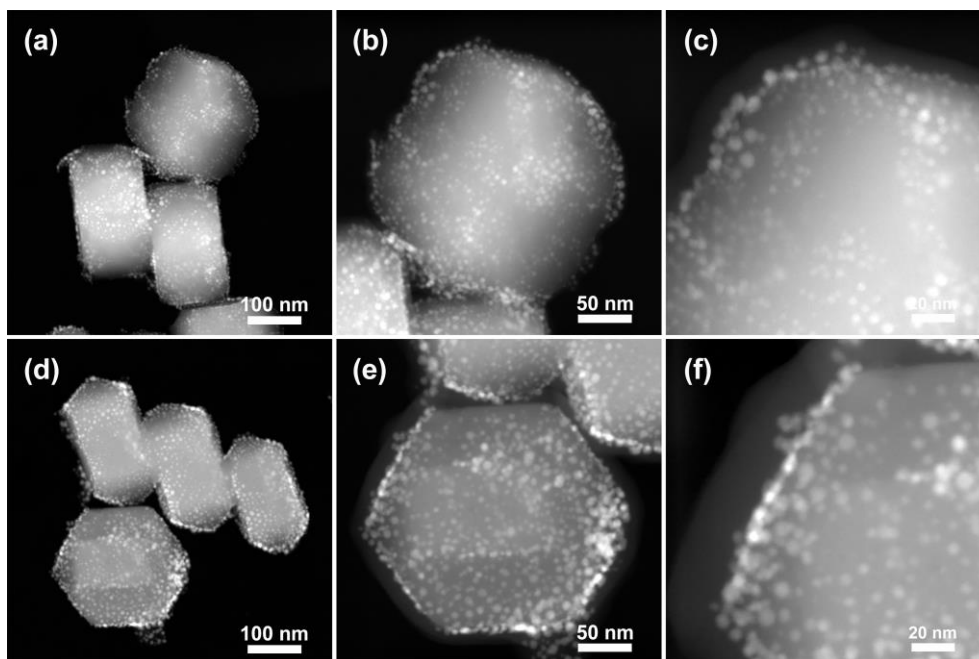

**Figure S6.** The HAADF-STEM images of catalysts 3% Ni/S-1-DP (a, b, c) and 10% Ni/S-1-DP (d, e, f).

**Table S3.** Comparative catalytic performance of representative DRM catalysts reported in literature versus the present work.

| Catalysts                              | Reaction conditions |                                               |                 | CH <sub>4</sub><br>Cov. % | CO <sub>2</sub><br>Cov. % | Reference |
|----------------------------------------|---------------------|-----------------------------------------------|-----------------|---------------------------|---------------------------|-----------|
|                                        | Temperature<br>(°C) | WHSV<br>(L·g <sup>-1</sup> ·h <sup>-1</sup> ) | Lifetime<br>(h) |                           |                           |           |
| 5% Ni@S-1-WI                           | 800                 | 30                                            | 200             | 88                        | 94                        | This work |
| Ni/ZSM-5                               | 800                 | 30                                            | 30              | 70                        | 74                        | [1]       |
| Ni-Ta/ZSM-5                            | 784                 | 33                                            | 60              | 80                        | 90                        | [2]       |
| Ni-Mo/ZSM-5                            | 750                 | 25                                            | 100             | 88                        | 94                        | [3]       |
| Ni-HAP-Ce                              | 750                 | 60                                            | 100             | 84                        | 92                        | [4]       |
| Ni/SiO <sub>2</sub>                    | 700                 | 40                                            | 200             | 70                        | 80                        | [5]       |
| Ni-MCM-41                              | 700                 | 45                                            | 200             | 70                        | 80                        | [6]       |
| 0.5Ni/CeNi <sub>x</sub> O <sub>y</sub> | 800                 | 36                                            | 140             | 80                        | 87                        | [7]       |
| Ni@Al <sub>2</sub> O <sub>3</sub>      | 800                 | 36                                            | 50              | 79                        | 82                        | [8]       |
| NiMo-MgO                               | 800                 | 60                                            | 200             | 100                       | 100                       | [9]       |

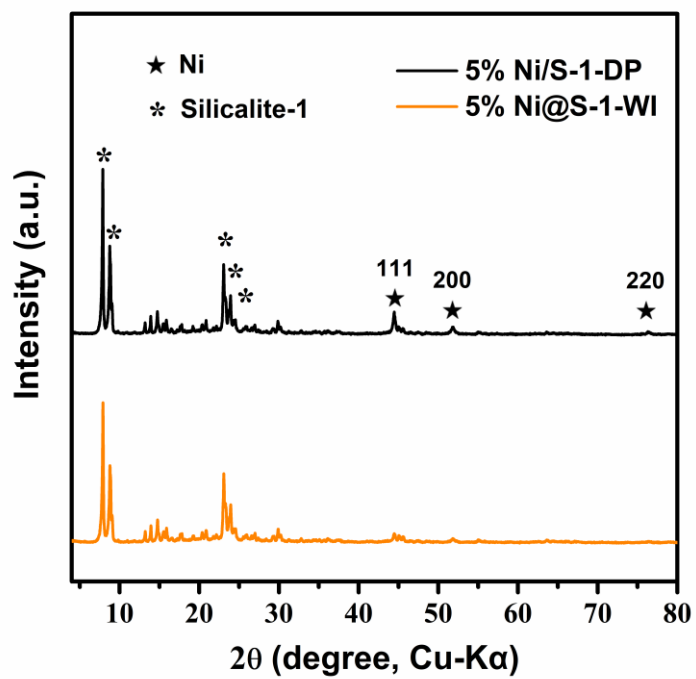

**Figure S7.** PXRd patterns of the spent 5% Ni@S-1-WI and 5% Ni/S-1-DP.

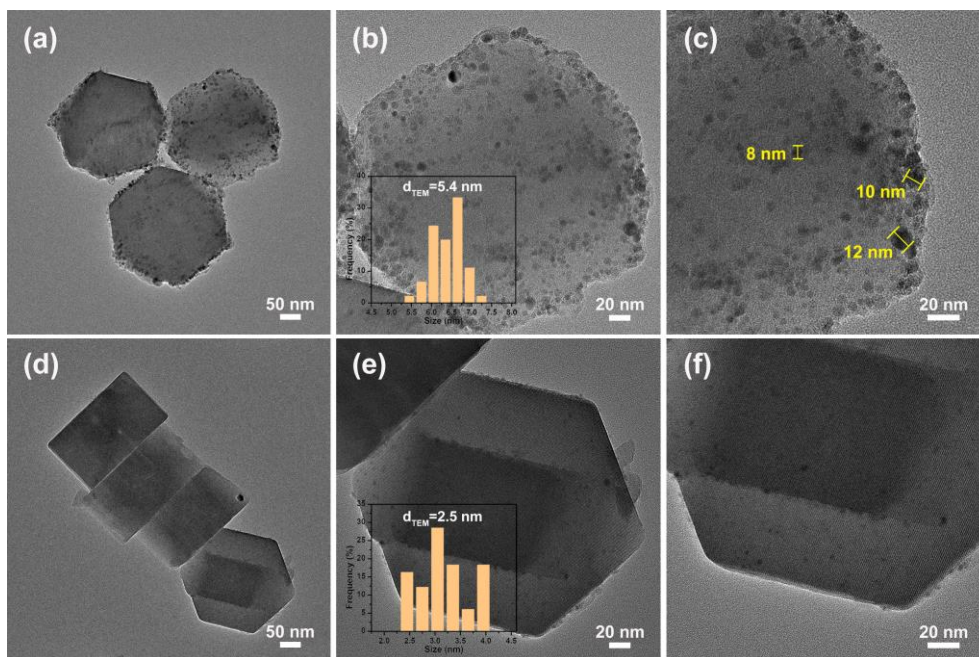

**Figure S8.** TEM images of the spent 5% Ni/S-1-DP (a, b, c) and 5% Ni@S-1-WI (d, e, f).

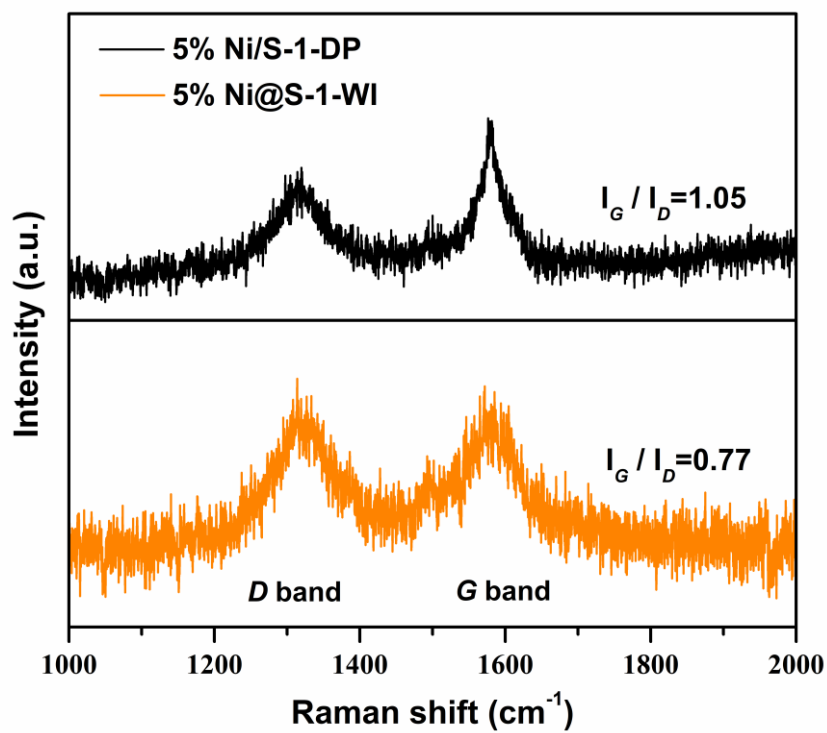

**Figure S9.** Raman spectra of the spent 5% Ni@S-1-WI and 5% Ni/S-1-DP.

## References

1. H. U. Hambali, A. A. Jalil, A. A. Abdulrasheed, T. J. Siang and D.-V. N. Vo, *J. Energy Inst.*, 2020, **93**, 1535–1543.
2. H. U. Hambali, A. A. Jalil, A. A. Abdulrasheed, T. J. Siang, A. H. K. Owgi and F. F. A. Aziz, *Chem. Eng. Sci.*, 2021, **231**, 116320.
3. X. Zhang, J. Deng, M. Pupucevski, S. Impeng, B. Yang, G. Chen, S. Kuboon, Q. Zhong, K. Faungnawakij, L. Zheng, G. Wu and D. Zhang, *ACS Catal.*, 2021, **11**, 12087–12095.
4. M. Akri, S. Zhao, X. Li, K. Zang, A. F. Lee, M. A. Isaacs, W. Xi, Y. Gangarajula, J. Luo, Y. Ren, Y.-T. Cui, L. Li, Y. Su, X. Pan, W. Wen, Y. Pan, K. Wilson, L. Li, B. Qiao, H. Ishii, Y.-F. Liao, A. Wang, X. Wang and T. Zhang, *Nat. Commun.*, 2019, **10**, 1–10.
5. J. Tian, B. Ma, S. Bu, Q. Yuan and C. Zhao, *Chem. Commun.*, 2018, **54**, 13993–13996.
6. J. Tian, H. Li, X. Zeng, Z. Wang, J. Huang and C. Zhao, *Chinese J. Catal.*, 2019, **40**, 1395–1404.
7. J. Dou, Z. Bao and F. Yu, *ChemCatChem*, 2018, **10**, 250–258.
8. Q. Huang, X. Fang, Q. Cheng, Q. Li, X. Xu, L. Xu, W. Liu, Z. Gao, W. Zhou and X. Wang, *ChemCatChem*, 2017, **9**, 3563–3571.
9. Y. Song, E. Ozdemir, S. Ramesh, A. Adishev, S. Subramanian, A. Harale, M. Albuali, B. A. Fadhel, A. Jamal, D. Moon, S. H. Choi and C. T. Yavuz, *Science*, 2020, **367**, 777–781.
